# Supplementary material for: The Characterization and Evaluation of the Soluble Triggering Receptor Expressed on Myeloid Cells-like Transcript-1 in Stable Coronary Artery Disease
Source: MDPI journal article supplement (doi:10.3390/ijms241713632), 2023-09-04
Supplement: s1 [file s1]

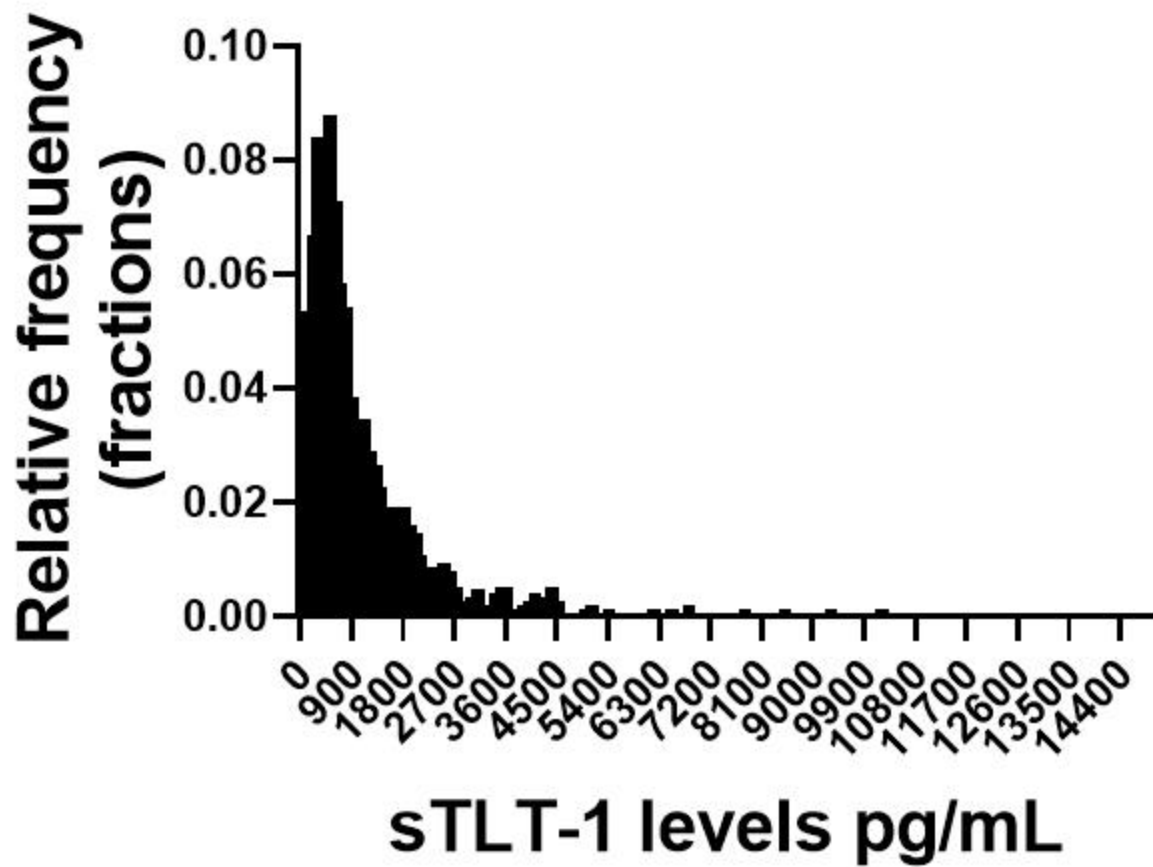

**Supplemental figure 1 - sTLT-1 Frequency of distribution**

sTLT-1 Frequency of distribution from patients in the PEACE clinical trial. The distribution figure was completed with a bin size of 100 pg/mL (Prism 9). The peak distribution was completed with a 5 pg/mL bin size.
